# Supplementary material for: Highly coordinative molecular cobalt–phthalocyanine electrocatalyst on an oxidized single-walled carbon nanotube for efficient hydrogen peroxide production
Source: Royal Society of Chemistry journal article supplement (doi:10.1039/d3mh02142d), 2024-01-01
Supplement: d3mh02142d1.pdf [file d3mh02142d1.pdf]

## Supporting Information

### Highly Coordinative Molecular Cobalt-Phthalocyanine Electrocatalyst on Oxidized Single-Walled Carbon Nanotubes for Efficient Hydrogen Peroxide Production

Yaoxin Li,<sup>ab</sup> Haoying Cheng,<sup>bc</sup> Meilin Wang,<sup>bc</sup> Jiaoxing Xu<sup>ab\*</sup> Lunhui Guan<sup>ab\*</sup>

*a.* College of Chemistry, Fuzhou University, Fuzhou, Fujian 350007, China.

*b.* CAS Key Laboratory of Design and Assembly of Functional Nanostructures, Fujian Provincial Key Laboratory of Nanomaterials, Fujian Institute of Research on the Structure of Matter, Chinese Academy of Sciences, Fuzhou, Fujian 350108, China.

*c.* College of Chemistry and Materials Science, Fujian Normal University, Fuzhou, Fujian 350007, China.

Correspondence should be addressed to: Jiaoxing Xu and Lunhui Guan, Fujian Institute of Research on the Structure of Matter, Chinese Academy of Sciences, Yangqiao Road West 155, Fuzhou, Fujian 350002, P.R. China. Email: [xujx\\_1220@fjirsm.ac.cn](mailto:xujx_1220@fjirsm.ac.cn), [guanlh@fjirsm.ac.cn](mailto:guanlh@fjirsm.ac.cn).

## Supplemental Experimental Procedures

### Chemicals

The precursors of Single-walled carbon nanotubes (SWCNTs) and Cobalt phthalocyanine (CoPc) were purchased from Ocsial and Adamas-beta respectively. Concentrated H<sub>2</sub>SO<sub>4</sub> (98.4%), HCl (37%), H<sub>2</sub>O<sub>2</sub> (30%), N, N-dimethylformamide (DMF) and KMnO<sub>4</sub> powder were purchased from Sinopharm Chemical Reagent Co., Ltd. (Shanghai, China) and used without further purification.

### Material synthesis

**Synthesis of *o*-SWCNT-2.** The synthesis of *o*-SWCNT-2 was conducted following the traditional Hummers' method<sup>1</sup>. Briefly, 200 mg of single-walled carbon nanotubes (SWCNTs) and 400 mg of KMnO<sub>4</sub> powder were dispersed into 30 mL H<sub>2</sub>SO<sub>4</sub> (98.4%), the mixture was transferred into an oil bath set at 50 °C and stirred for 3 hours. After an ice bath, the product was diluted to 150 ml using deionized water and 10 mL of H<sub>2</sub>O<sub>2</sub> (30%) solution was added to the mixture and reacted for 15 minutes. Then, the precipitate was collected by filtration and washed with 150 ml of HCl solution (the volume ratio of HCl to H<sub>2</sub>O was 1:9) to completely eliminate metal clusters. After filtering, the final solid sample was homogeneously dispersed in 200 mL of deionized water. Then, the homogeneous dispersion was centrifuged at 13,500 rpm for 30 minutes, leading to solid-liquid separation. The upper liquid was carefully removed and the centrifugation process was repeated until a neutral pH was reached in upper liquid. The precipitate obtained by centrifugation was dispersed in 200 ml of deionized water and sonicated for 15 minutes. Subsequently, the slurry was centrifuged again at 13500 rpm for 30 minutes and the upper brown solution was collected as *o*-SWCNT-2.

**Synthesis of CoPc-Xwt%/o-SWCNT-2.** 30 mg of *o*-SWCNT-2 and a calculated amount of CoPc (0, 1, 3, 6, 9 wt%) were dispersed in 30 ml of DMF solution with sonication for 30 minutes respectively. Subsequently, both of them were mixed with sonication for another 30 minutes to obtain a well-mixed dispersion. The CoPc-Xwt%/o-SWCNT-2 electrocatalysts were obtained by stirred the mixing

dispersion for 24 h and followed by a freeze-drying process.

**Synthesis of CoPc-6wt%/o-SWCNT-Y.** The feeding ratio of  $\text{KMnO}_4$  and SWCNT powder was adjusted from 1 to 3 to obtain *o*-SWCNT-Y (Y indicates  $\text{KMnO}_4/\text{SWCNT}$ , Y=1, 2 and 3) with different oxidative degree. The as-prepared *o*-SWCNT-Y support were used to fabricate CoPc-6wt%/o-SWCNT-Y in same process.

## Characterization

Field emission scanning electron microscopy (FE-SEM, SU8010), transmission electron microscopy (TEM), high-resolution TEM (HR-TEM) and high-angle annular dark-field scanning TEM (HAADF-STEM) were performed to analyze the morphology and microstructure of catalysts. Aberration-corrected high-angle annular dark-field scanning transmission electron microscopy (HAADF-STEM, JEM-ARM300F) was used to analyze the single atom structure of catalysts. Co *K*-edge X-ray absorption near-edge structure (XANES) and extended X-ray absorption fine structure (EXAFS) analyses were used to determine the electronic structure and local coordination of Co in the catalysts. X-ray diffraction (XRD) characterization was performed on a Miniflex 600 diffractometer with Cu  $K\alpha$  X-rays (1.5406 Å). The surface chemical states of the samples were investigated through X-ray photoelectron spectroscopy (XPS, ESCALAB 250 Xi). The Co concentration on catalysts was evaluated on the Inductively coupled plasma optical emission spectroscopy [ICP-OES, NexION 2000-(A-10)].

## Electrochemical measurements

The electrochemical performance for  $2e^-$  ORR of various catalysts was investigated using the CHI760E electrochemical workstation (Shanghai CH Instruments, Inc., China) with a three-electrode configuration system at room temperature. A high-purity graphite rod and Ag/AgCl electrode with saturated KCl salt bridge were used as the counter electrode and reference electrode respectively. The

Rotating Ring Disk Electrode (RRDE) is composed of glassy carbon disk electrode (0.2475 cm<sup>2</sup>) and Pt ring electrode (0.1866 cm<sup>2</sup>). The homogeneous catalyst ink was prepared by dispersing 3 mg of as-prepared catalyst powder in a solution containing 60 μL of Nafion (5 wt%) and 540 μL of isopropanol with sonication at least 30 minutes. The well-dispersed ink was then dropped on glassy carbon disk electrode with a loading of 0.1 mg cm<sup>-2</sup>. Before the electrochemical measurement, the pre-activation was conducted by scanning cycle voltammetry (CV) curves (60 cycles, scan rate: 10 mV/s) in O<sub>2</sub>-saturated 0.1 M K<sub>2</sub>SO<sub>4</sub> electrolyte until stable CV curves were obtained. The linear sweep voltammetry (LSV) curves of the catalysts were measured with various rotation rate of 500, 900, 1200, 1600, 2000 and 2500 rpm (scan rate: 10 mV/s) and electrode potentials were converted to the reversible hydrogen electrode (RHE) using the equation *S1*. The H<sub>2</sub>O<sub>2</sub> selectivity and electro transfer number (*n*) were calculated by the following equation *S2* and *S3*. Moreover, the *n* of CoPc-6wt%/o-SWCNT-2 was calculated by the Koutecky-Levich (K-L) equation *S4* and *S5*.

$$E(\text{RHE}) = E(\text{Ag}/\text{AgCl}) + 0.059 \times \text{pH} + 0.197 \quad (S1)$$

$$n = 4 \times I_D / (I_D \times N + I_R) \quad (S2)$$

$$\text{Selectivity (H}_2\text{O}_2) \% = 200 \times I_R / (I_D \times N + I_R) \quad (S3)$$

$$\frac{1}{j} = \frac{1}{j_k} + \frac{1}{j_d} = \frac{1}{j_k} + \frac{1}{B\omega^{1/2}} \quad (S4)$$

$$K = 0.62nFC_0D_{O_2}v^{-1/6} \quad (S5)$$

Where, the  $I_D$  is the disk current, and the  $I_R$  is the ring current;  $j$  indicates the measured current density,  $j_d$  is the kinetic current density;  $j_k$  is the diffusion-limiting current density;  $\omega$  is the angular velocity of the disk (rpm min<sup>-1</sup>);  $n$  is the number of electrons transferred in the ORR;  $F$  is the for Faraday constant (96485 C mol<sup>-1</sup>).  $C_0$  and  $D_{O_2}$  is the bulk concentration of O<sub>2</sub> (1.2×10<sup>-6</sup> mol cm<sup>-3</sup>) and diffusion coefficient of O<sub>2</sub> (1.9×10<sup>-5</sup> cm<sup>2</sup> s<sup>-1</sup>), respectively;  $v$  is the kinematic viscosity of the electrolyte (0.01 cm<sup>2</sup> s<sup>-1</sup>); the above parameters are determined under the standard atmospheric pressure of 25 °C.

The EIS was evaluated in O<sub>2</sub>-saturated 0.1 M K<sub>2</sub>SO<sub>4</sub> electrolyte using the Zahner electrochemical workstation. The test voltage and disturbance voltage were set at 0.1 V vs. RHE and 5 mV in a frequency range from 100 kHz to 10 mHz.

## **Bulk electrosynthesis and electro-Fenton degradation of a model organic pollutant on CoPc-6wt%/o-SWCNT-2 catalyst**

The H<sub>2</sub>O<sub>2</sub> yield was measured in O<sub>2</sub>-saturated 0.1 M K<sub>2</sub>SO<sub>4</sub> electrolyte in H-cell device where cathode and anode chamber were separated by the nafion-212 membrane. Pt wire and Ag/AgCl electrode were used as the counter and reference electrode, respectively. The gas diffusion electrode (GDE) was made by coating 0.1 mg cm<sup>-2</sup> catalyst on 1 cm<sup>2</sup> carbon paper. The chronoamperometry (i-t) curves for 0.5 h at various potentials (0.1, 0.2 and 0.3 V vs. RHE) were captured and the cathode potential was maintained at 0.1 V vs. RHE to test the stability of catalyst.

The H<sub>2</sub>O<sub>2</sub> production rate was further measured in Flow-cell device in O<sub>2</sub>-saturated 1 M Na<sub>2</sub>SO<sub>4</sub>. The ink of catalyst was dropped on 2 cm<sup>2</sup> carbon paper with a loading of 0.1 mg cm<sup>-2</sup>. During the test, the recycled rate of electrolyte and O<sub>2</sub> supply rate were maintained at 5 ml min<sup>-1</sup> and 25 ml min<sup>-1</sup>, respectively. The H<sub>2</sub>O<sub>2</sub> concentration was measured by traditional KMnO<sub>4</sub> titration method according to Chinese national standard GB/T23499-2009<sup>2</sup>. The concentration of H<sub>2</sub>O<sub>2</sub> production and faradaic efficiency (FE) were calculated by the following equation S6 and S7.

$$C_{H_2O_2} = 5 \times C_{KMnO_4} \times V_{KMnO_4} \div 2 V_{H_2O_2} \quad (S6)$$

$$FE (\%) = 2CVF / Q (\%) \quad (S7)$$

Where C is the H<sub>2</sub>O<sub>2</sub> concentration (mol L<sup>-1</sup>), V represents the volume of electrolyte (L), F indicates the faraday constant (96485 C mol<sup>-1</sup>), Q is the consumed charge amount (C).

Turnover frequency (TOF) calculation for H<sub>2</sub>O<sub>2</sub> electrosynthesis. TOF signifies the quantity of O<sub>2</sub> converted into the objective H<sub>2</sub>O<sub>2</sub> by a single active site per time. The TOF equations were derived as

follows.

$$TOF (s^{-1}) = \frac{TON_{O_2}}{n} = \frac{j/2F}{n} \quad (S8)$$

$$(TON_{O_2}) = j \left[ \frac{A}{cm^2} \right] \times FE \times \frac{1[C/s]}{1[A]} \times \frac{1[mol e^-]}{96485[C]} \times \frac{1[mol O_2]}{2[mol e^-]} \times (6.02 \times 10^{23} \left[ \frac{atom O_2}{mol O_2} \right]) \quad (S9)$$

$$n = M \left[ \frac{mg}{cm^2} \right] \times R [wt\%] \times \frac{1[mmol]}{W[mg]} \times (6.02 \times 10^{20} \left[ \frac{atom O_2}{mol O_2} \right]) \quad (S10)$$

Where, the  $j$  is cathode catalytic current density,  $F$  represents the faraday constant (96,485 C mol<sup>-1</sup>),  $FE$  indicates the Faradaic efficiency of H<sub>2</sub>O<sub>2</sub> production,  $n$  signifies the number of active sites. CoPc-6wt%/o-SWCNT-2 was taken as an example.

$$-(TON_{O_2}) = 0.04 \left[ \frac{A}{cm^2} \right] \times 0.73 \times \frac{1[C/s]}{1[A]} \times \frac{1[mol e^-]}{96485[C]} \times \frac{1[mol O_2]}{2[mol e^-]} \times (6.02 \times 10^{23} \left[ \frac{atom O_2}{mol O_2} \right]) = 9.1 \times 10^{16} \left[ \frac{atom O_2}{mol O_2} \right]$$

$$-(\text{number of CoPc site}) = 0.1 \left[ \frac{mg}{cm^2} \right] \times 0.0036 \times \frac{1[mmol]}{58.933[mg]} \times (6.02 \times 10^{20} \left[ \frac{atom O_2}{mol O_2} \right]) = 3.6 \times 10^{15} \left[ \frac{atom O_2}{mol O_2} \right]$$

Electron-Fenton degradation test was performed in O<sub>2</sub>-saturated 0.1 M acidified K<sub>2</sub>SO<sub>4</sub> solution (pH 2~3) in H-cell device at 0.1 V vs. RHE. To prepared working electrode, 0.1 mg CoPc-6wt%/o-SWCNT-2 catalyst ink was deposited on 1 cm<sup>2</sup> carbon paper. MB (50 mg/L) and Fe<sup>2+</sup> (0.5 mM) were added to the electrolyte on the working electrode side. A portion of electrolyte was taken from cathode chamber every 5 minutes and the MB concentration of electrolyte was determined by UV-vis spectrophotometry.

## DFT Calculation methods and details.

We performed the density functional theory (DFT) based calculations<sup>3</sup> by using the Vienna Ab initio Simulation Package (VASP),<sup>4, 5</sup> which enabled us to achieve the relaxed geometries and total energies. We adopted the projector augmented wave (PAW)<sup>6</sup> method describe the nuclei-electron interactions. The Perdew-Burke-Ernzerhof (PBE) functional within the generalized gradient approximation (GGA)<sup>7</sup> was employed to calculate the exchange-correlation energy. the van der Waals (vdW) correction proposed by Grimme (DFT-D3) was employed due to its good description of long-range vdW interactions.<sup>8</sup> The vacuum space was set to larger than 15 Å in the z direction to avoid

interactions between periodic images. The kinetic cutoff energy was set to 500 eV. In addition, the plane wave basis expansion with force was set as 0.02 eV/Å on each atom for the convergence criterion of geometry relaxation. All the surface calculation was performed by the 3×3×1 Monkhorst-Pack grid k-points mesh.

Here, we used computational hydrogen electrode (CHE) model proposed by Nørskov et al. to calculate the free energy levels of all intermediates:<sup>9</sup>

$$\Delta G_{\text{ads}} = \Delta E_{\text{ads}} + \Delta ZPE - T\Delta S + eU \quad (S11)$$

where  $\Delta E_{\text{ads}}$  is the binding energy of adsorption species HOO\*.  $\Delta ZPE$ ,  $\Delta S$ ,  $U$  and  $e$  are the ZPE changes, entropy changes, applied potential at the electrode, and charge transferred. The contributions of each component for  $\Delta G_{\text{ads}}$  were obtained from previous literature.<sup>10</sup>

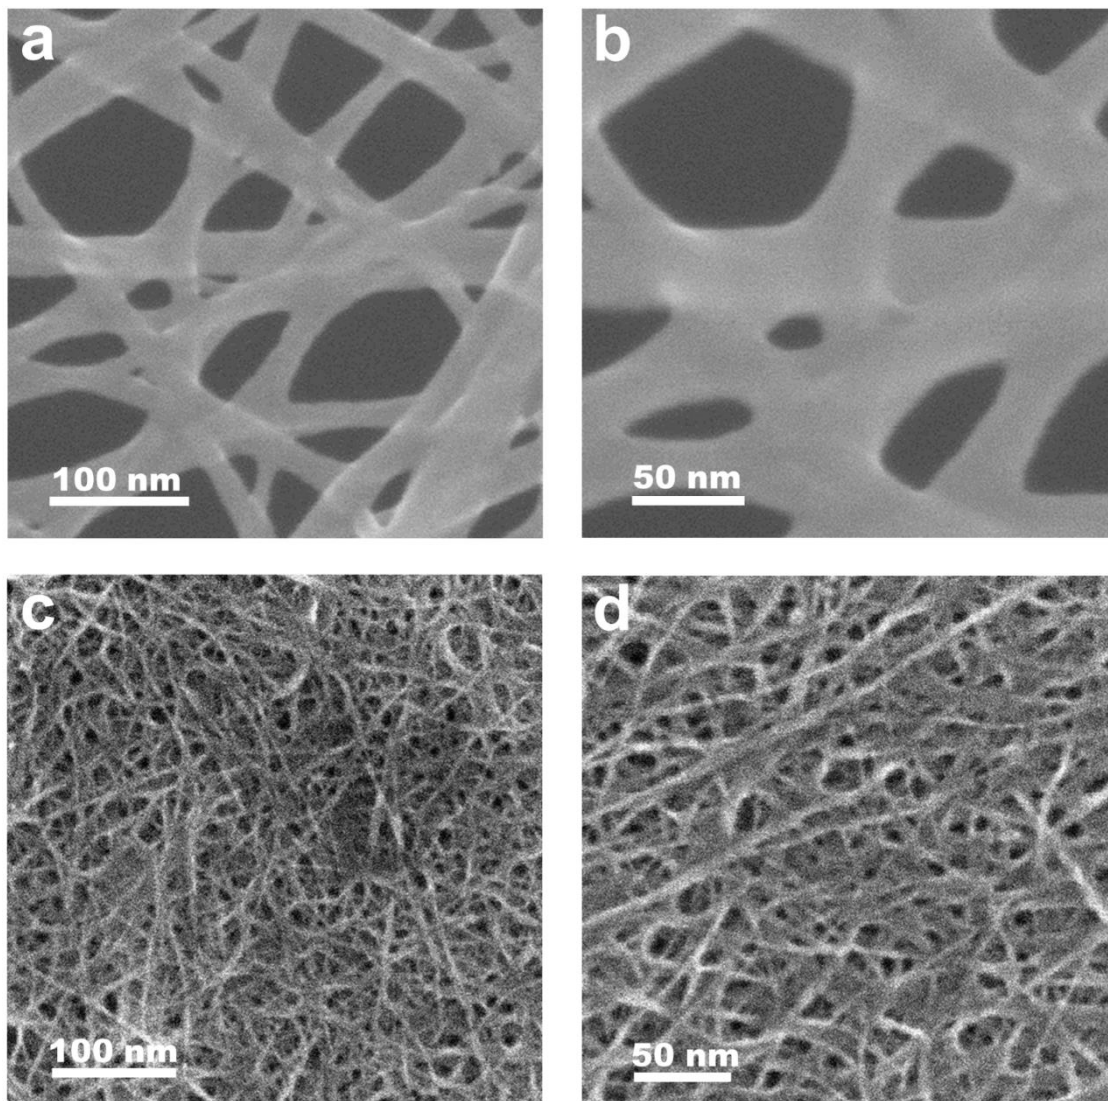

**Fig. S1.** The SEM images of original (a-b) SWCNT and (c-d) *o*-SWCNT-2.



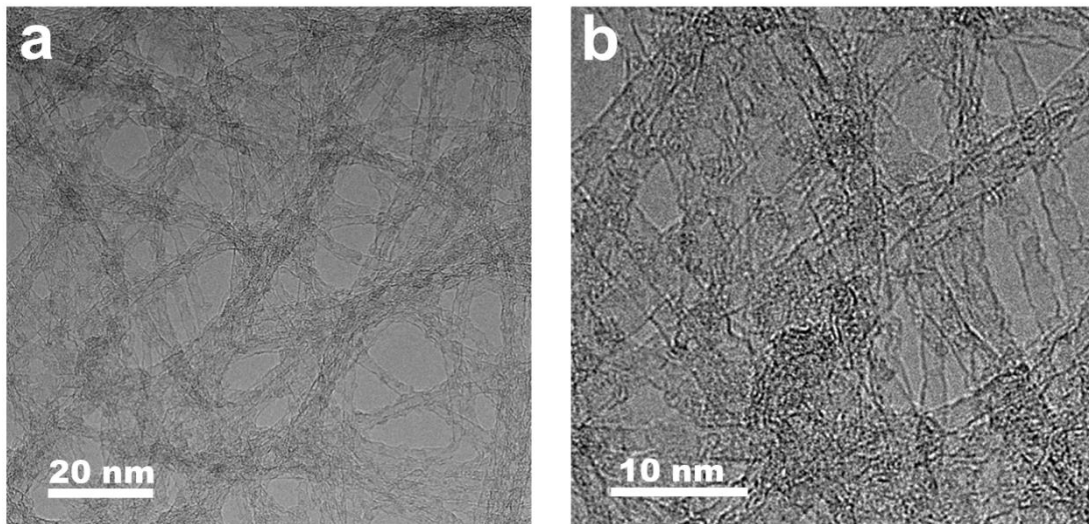

**Fig. S2.** (a-d) The HR-TEM images of *o*-SWCNT-2.

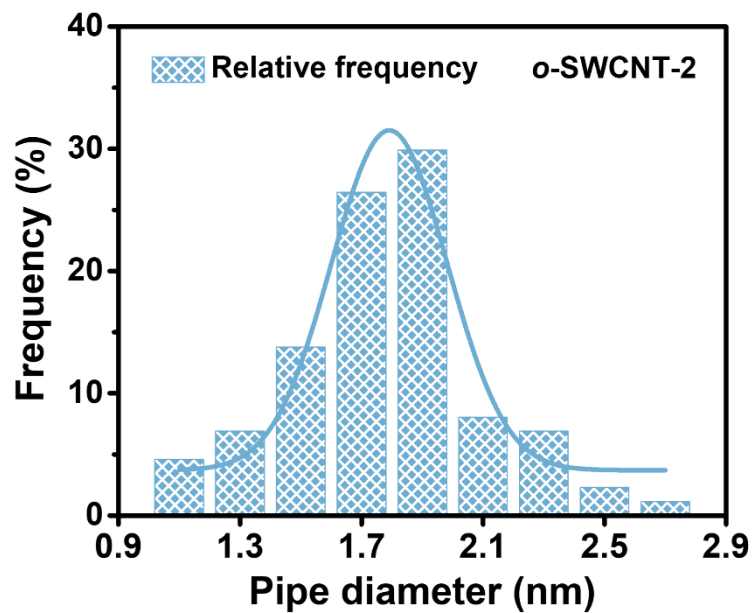

**Fig. S3.** The pipe-diameter distribution of *o*-SWCNT-2.

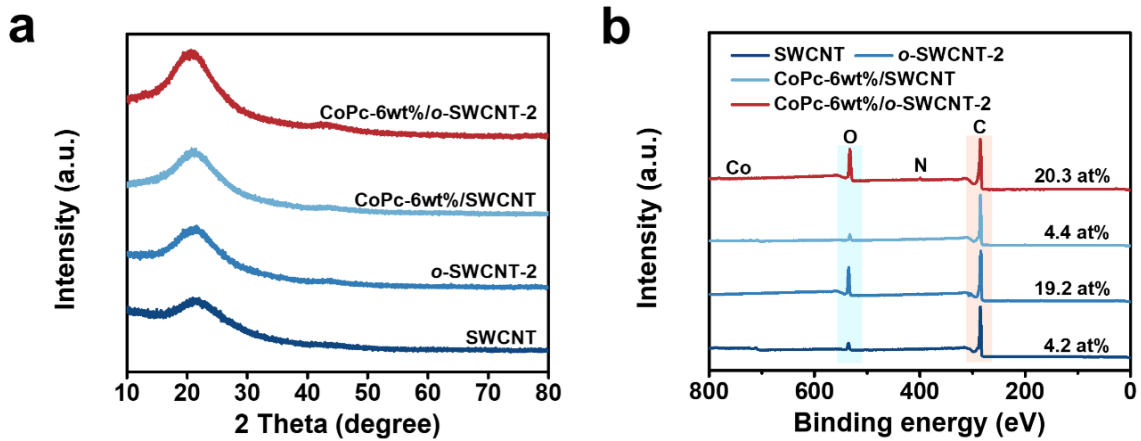

**Fig. S4.** (a-b) XRD patterns and XPS survey spectra of SWCNT, *o*-SWCNT-2, CoPc-6wt%/SWCNT and CoPc-6wt%/ *o*-SWCNT-2.

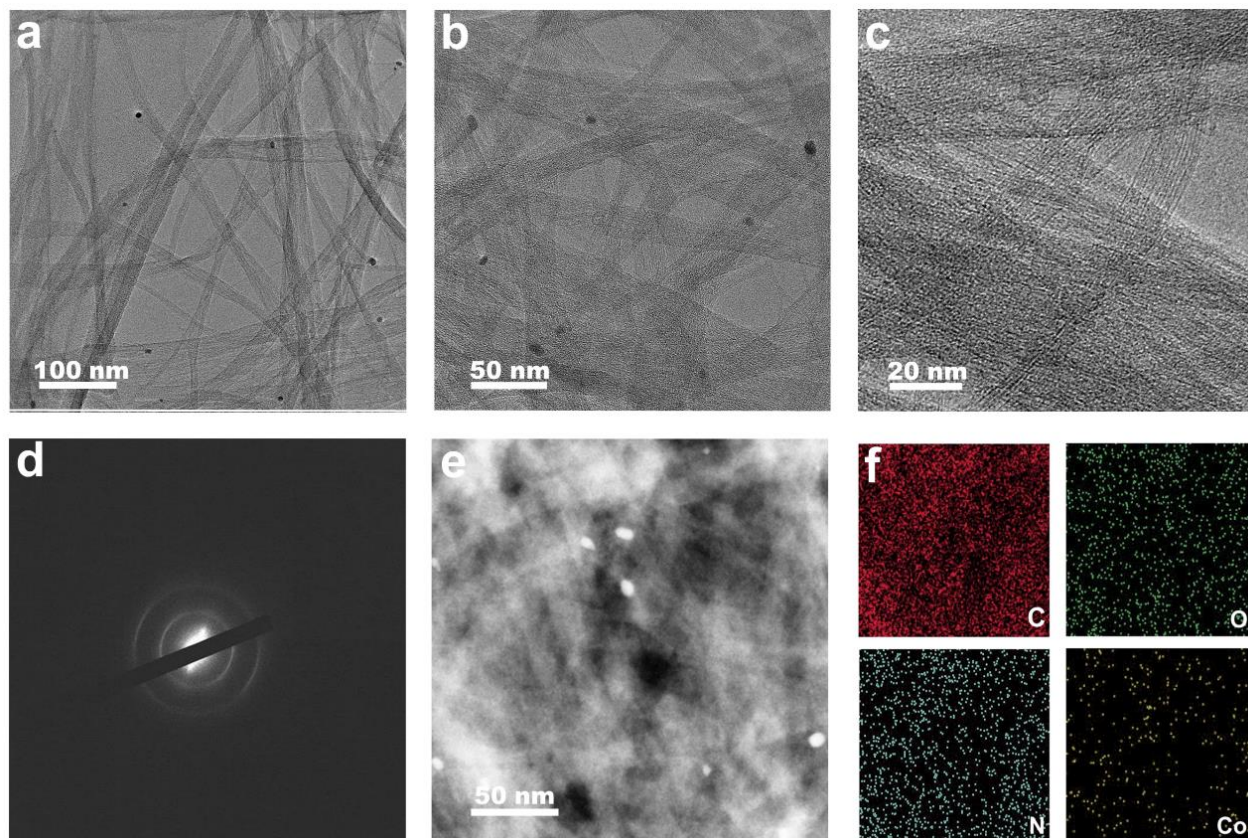

**Fig. S5.** (a-d) TEM, HR-TEM and EDX images of the CoPc-6wt%/o-SWCNT-1 catalyst; (e) The TEM-HAADF image and (f) Elemental mappings of C, O, N and Co.

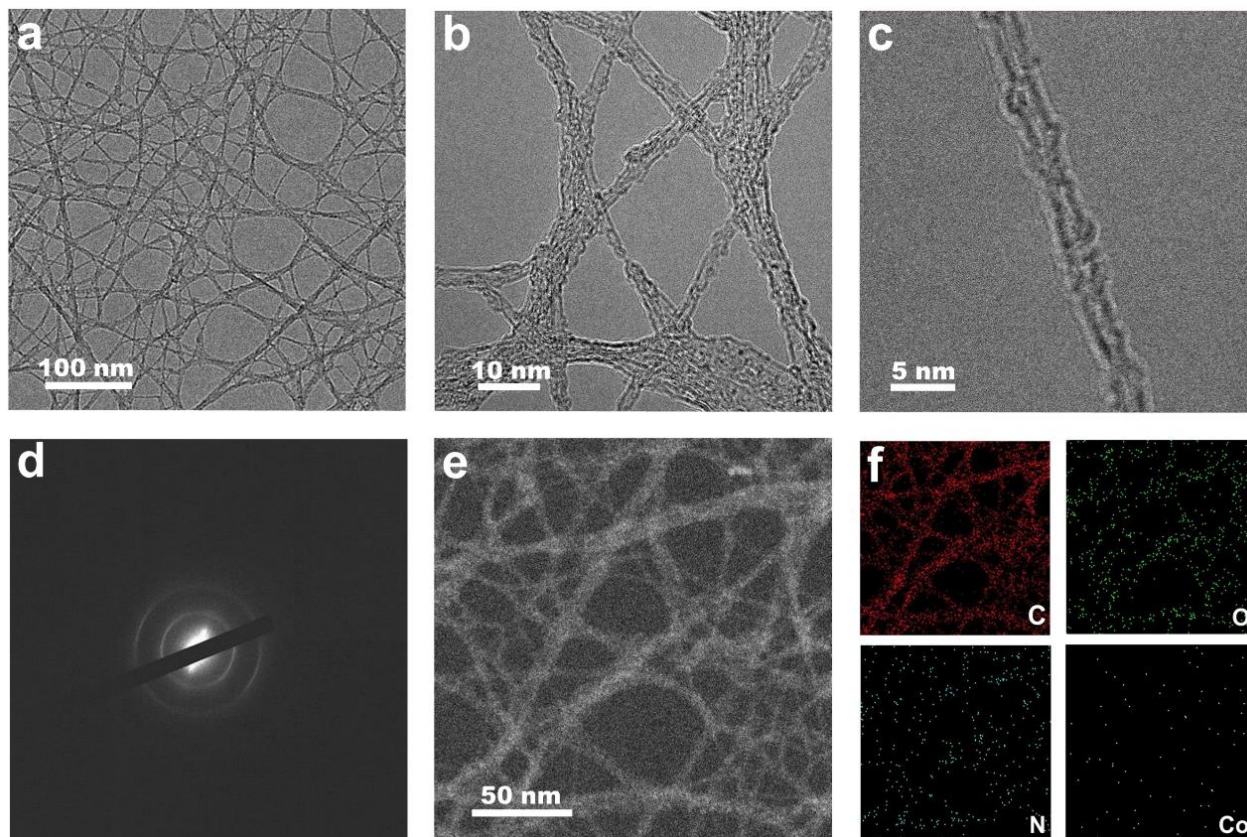

**Fig. S6.** (a-d) TEM, HR-TEM and EDX images of the CoPc-6wt%/o-SWCNT-3 catalyst; (e) The TEM-HAADF image and (f) Elemental mappings of C, O, N and Co.

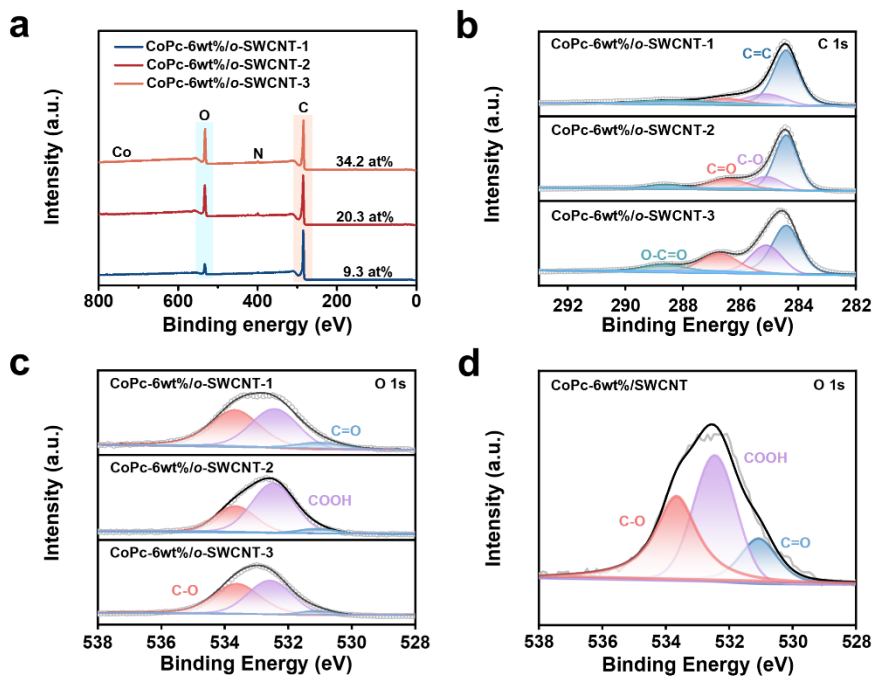

**Fig. S7.** (a) XPS survey spectra, (b) C *1s* high-resolution spectra and (c) O *1s* high-resolution spectra of CoPc-6wt%/o-SWCNT-1, CoPc-6wt%/o-SWCNT-2 and CoPc-6wt%/o-SWCNT-3. (d) O *1s* high-resolution spectra of CoPc-6wt%/SWCNT.



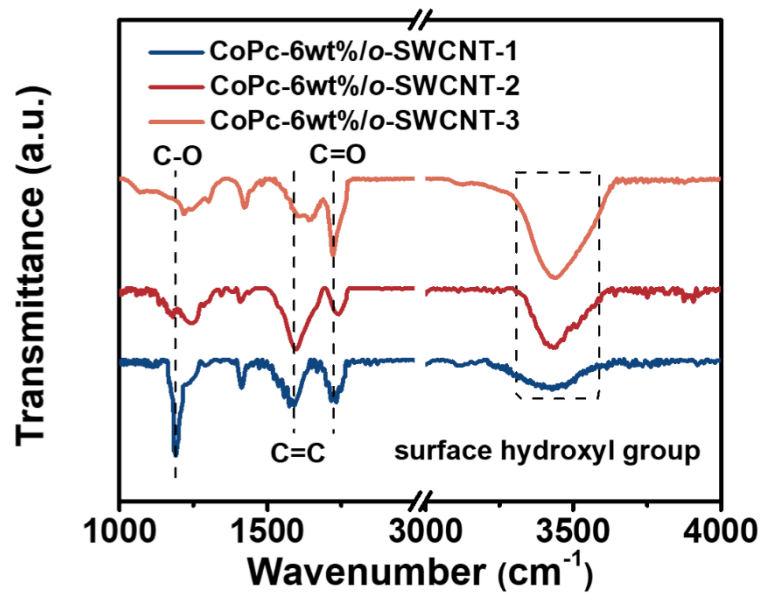

**Fig. S8.** (a) FT-IR spectrum of CoPc-6wt%/o-SWCNT-1, CoPc-6wt%/o-SWCNT-2 and CoPc-6wt%/o-SWCNT-3.

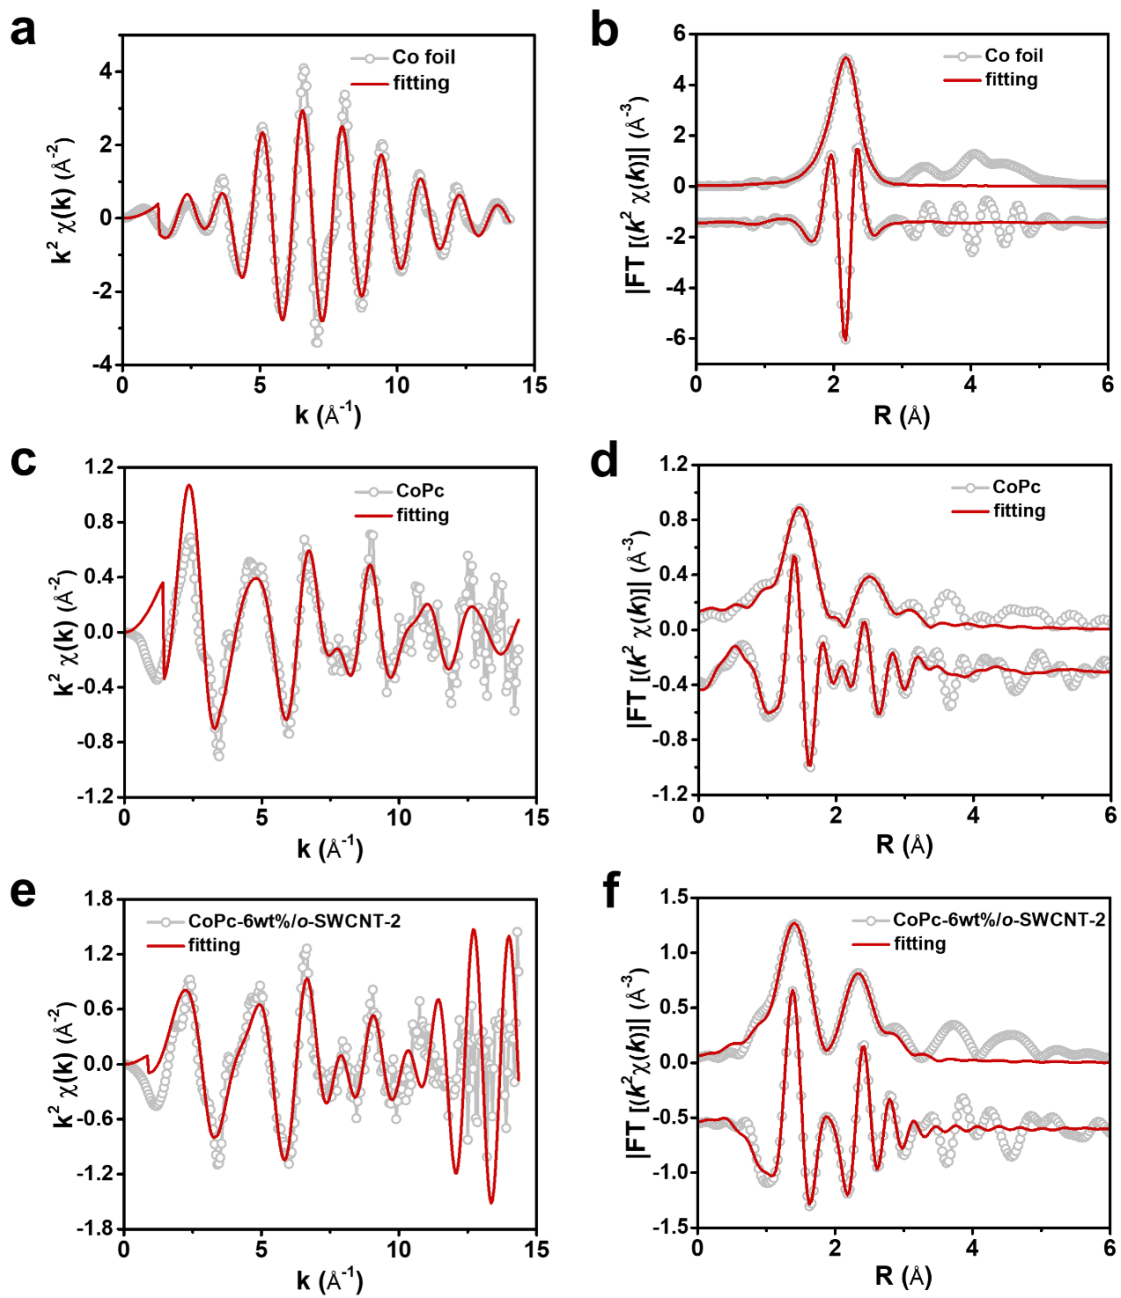

**Fig. S9.** (a-b) EXAFS analysis of Co foil at  $K$  space and  $R$  space, respectively. (c-d) EXAFS analysis of CoPc at  $K$  space and  $R$  space, respectively. (e-f) EXAFS analysis of CoPc-6wt%/o-SWCNT-2 at  $K$  space and  $R$  space, respectively.



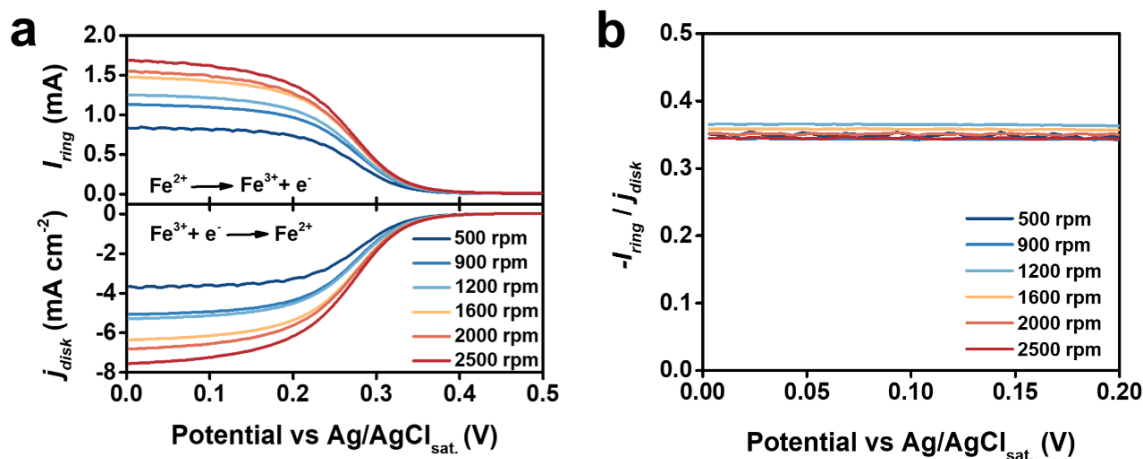

**Fig. S10.** Calibration of the collection efficiency of the RRDE by the redox of potassium ferricyanide.

**Note:** The collection efficiency (N) of the rotating ring-disk electrode (RRDE) was evaluated in 10 mM  $[\text{K}_3\text{Fe}(\text{CN})_6]$  and 1 M KCl electrolyte with Pt plate as the counter electrode and Ag/AgCl electrode. To facilitate the reduction of  $\text{Fe}^{3+}$  to  $\text{Fe}^{2+}$ , the potential of the disk electrode was scanned in the range of 0.5 V to 0 V vs. Ag/AgCl. Conversely, the potential of the Pt ring was maintained at 0.5 V vs. Ag/AgCl to oxidize  $\text{Fe}^{2+}$  to  $\text{Fe}^{3+}$ . The collection efficiency (N) was calculated  $\text{CE} = -I_{Ring}/I_{Disk}$ , where  $I_{Ring}$  and  $I_{Disk}$  represent the current on Pt ring electrode and glassy carbon disk respectively.

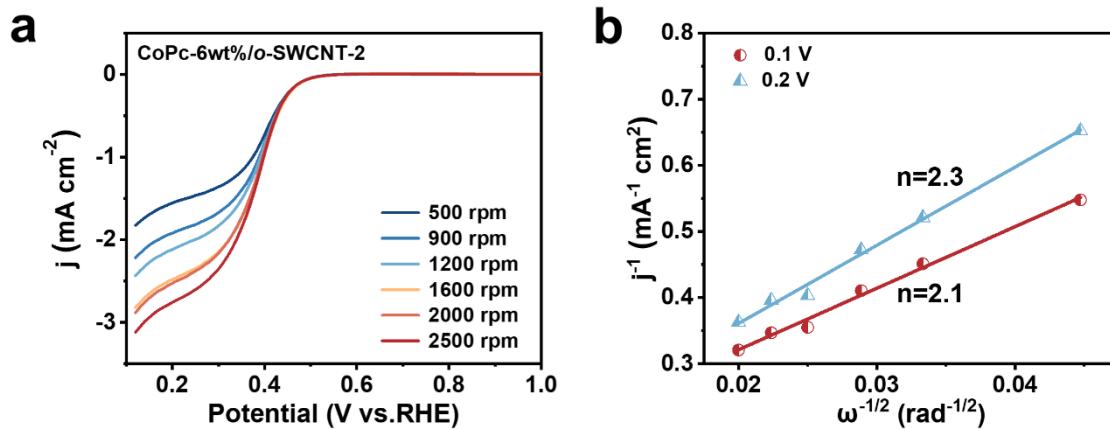

**Fig. S11.** (a) Lsv curves toward  $2e^-$  ORR of CoPc-6wt<sup>0</sup>%/o-SWCNT-2 at various rotation speeds. (b) The calculated electron transfer number ( $n$ ) at different potentials according to the Koutecky-Levich diffusion equation.

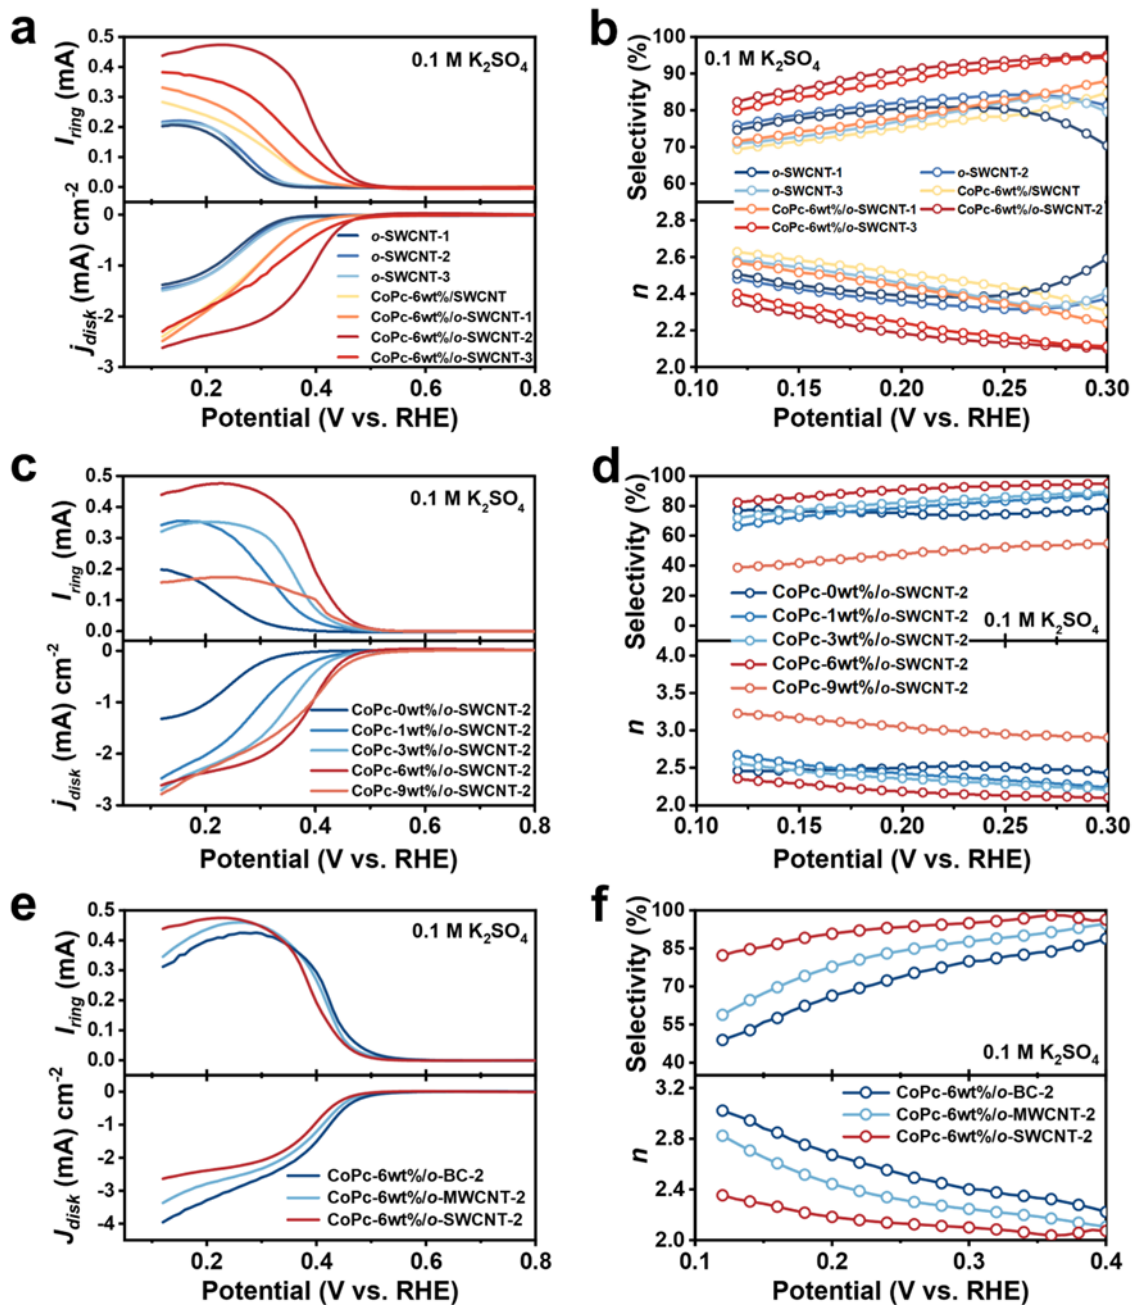

**Fig. S12.** (a) LSV curves of *o*-SWCNT-1, *o*-SWCNT-2, *o*-SWCNT-3, CoPc-6wt%/SWCNT, CoPc-6wt%/o-SWCNT-1, CoPc-6wt%/o-SWCNT-2 and CoPc-6wt%/o-SWCNT-3 in O<sub>2</sub>-saturated 0.1 M K<sub>2</sub>SO<sub>4</sub> solution at 1600 rpm. (b) the corresponding H<sub>2</sub>O<sub>2</sub> selectivity and electron transfer number (*n*). (c) LSV curves of CoPc-0wt%/o-SWCNT-2, CoPc-1wt%/o-SWCNT-2, CoPc-3wt%/o-SWCNT-2, CoPc-6wt%/o-SWCNT-2 and CoPc-9wt%/o-SWCNT-2 in O<sub>2</sub>-saturated 0.1 M K<sub>2</sub>SO<sub>4</sub> solution at 1600 rpm. (d) the corresponding H<sub>2</sub>O<sub>2</sub> selectivity and electron transfer number (*n*). (e) LSV curves of CoPc-6wt%/o-SWCNT-2, CoPc-6wt%/o-MWCNT-2 and CoPc-6wt%/o-BC-2 in O<sub>2</sub>-saturated 0.1 M K<sub>2</sub>SO<sub>4</sub> solution at 1600 rpm. (f) the corresponding H<sub>2</sub>O<sub>2</sub> selectivity and electron transfer number (*n*).

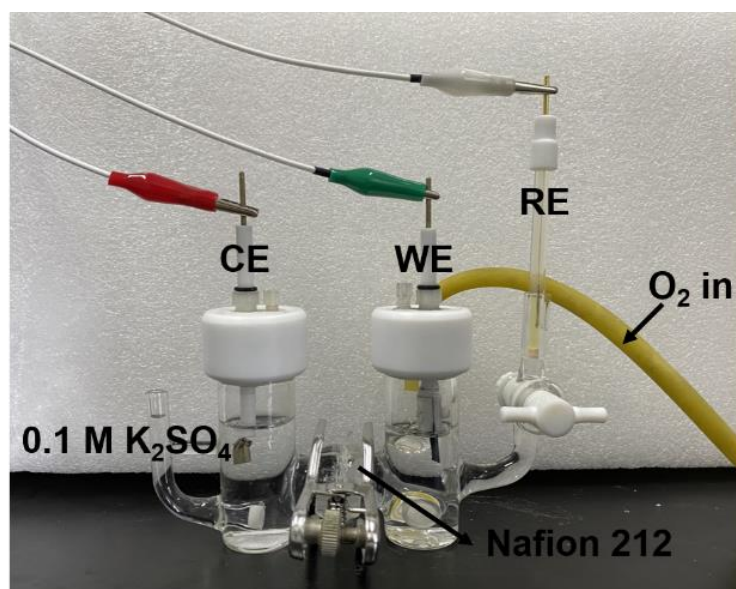

**Fig. S13.** The photograph of the H-cell device used in this study.

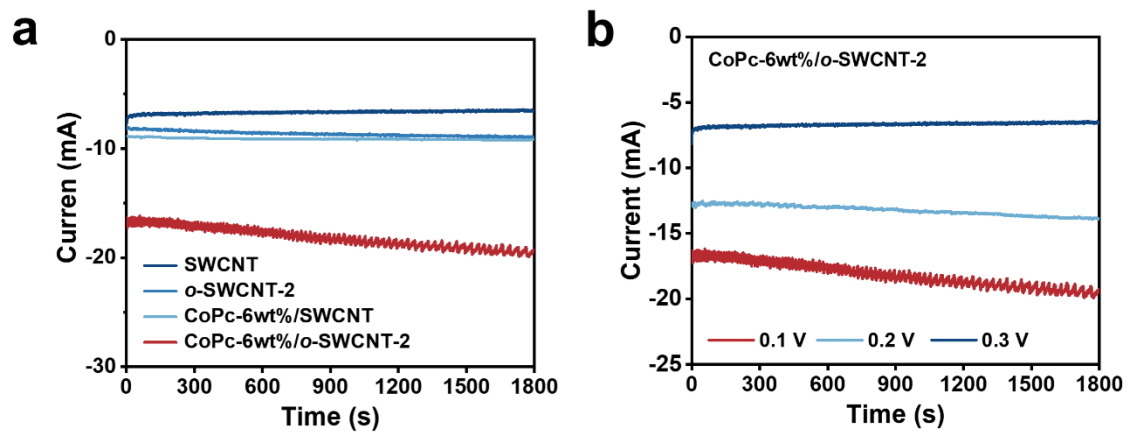

**Fig. S14.** (a) The chronoamperometry curves of SWCNT(O), *o*-SWCNT-2, CoPc-6wt%/SWCNT and CoPc-6wt%/o-SWCNT-2 in O<sub>2</sub>-saturated 0.1 M K<sub>2</sub>SO<sub>4</sub> electrolyte at 0.1 V for 1800s. (b) The chronoamperometry curves of CoPc-6wt%/o-SWCNT-2 in O<sub>2</sub>-saturated 0.1 M K<sub>2</sub>SO<sub>4</sub> electrolyte at different potentials (0.1, 0.2 and 0.3 V) for 1800s.

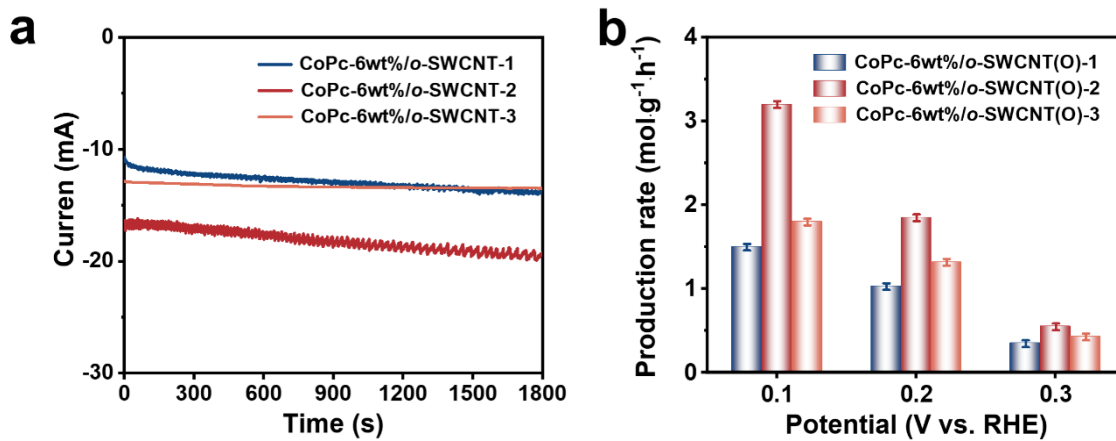

**Fig. S15.** (a) The chronoamperometry curves of CoPc-6wt%/o-SWCNT-1, CoPc-6wt%/o-SWCNT-2 and CoPc-6wt%/o-SWCNT-3 in O<sub>2</sub>-saturated 0.1 M K<sub>2</sub>SO<sub>4</sub> electrolyte at 0.1 V for 1800s. (b) The corresponding H<sub>2</sub>O<sub>2</sub> production rate and Faradaic efficiency of three catalysts.

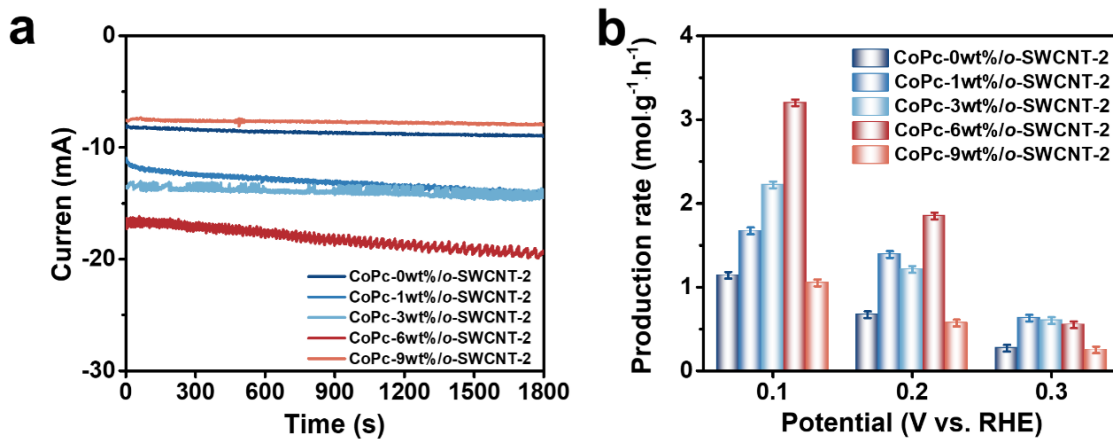

**Fig. S16.** (a) The chronoamperometry curves of CoPc-0wt%/o-SWCNT-2, CoPc-1wt%/o-SWCNT-2, CoPc-3wt%/o-SWCNT-2, CoPc-6wt%/o-SWCNT-2 and CoPc-9wt%/o-SWCNT-2 in O<sub>2</sub>-saturated 0.1 M K<sub>2</sub>SO<sub>4</sub> electrolyte at 0.1 V for 1800s. (b) The corresponding H<sub>2</sub>O<sub>2</sub> production rate plots of five catalysts.

**a**

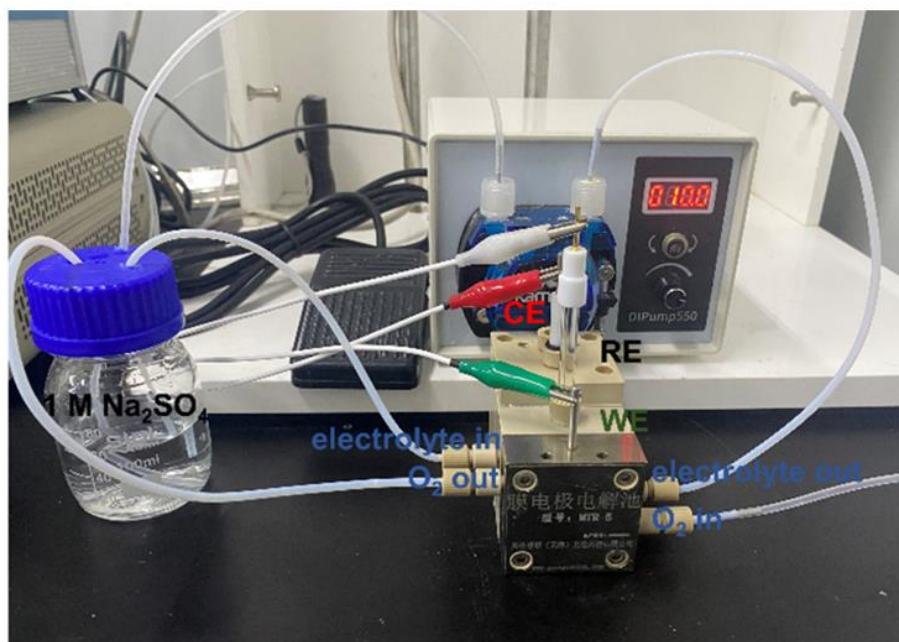

**b**

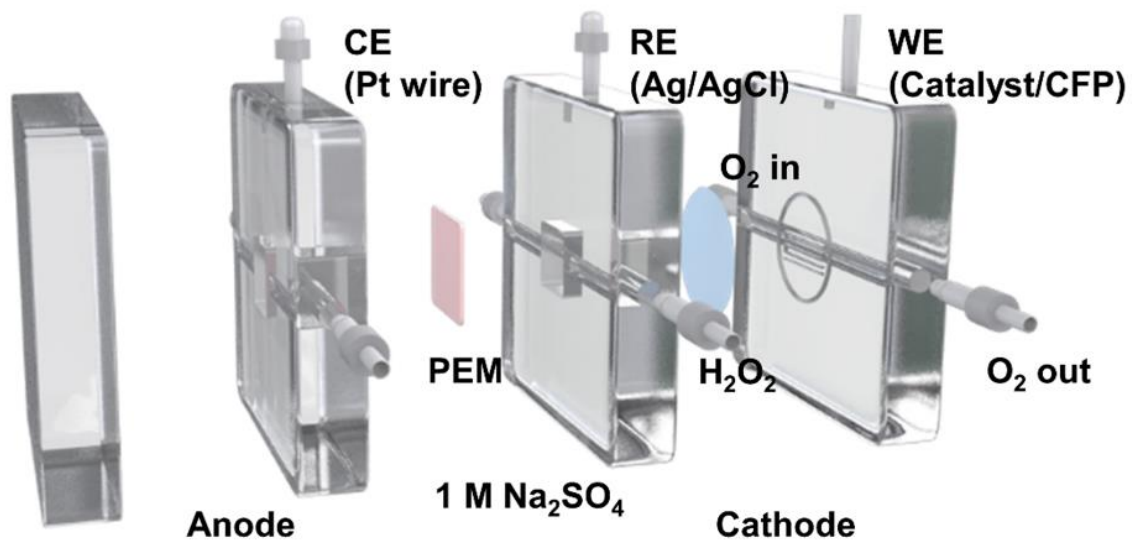

**Fig. S17.** The photograph and schematic diagram of the Flow-cell device used in this study.



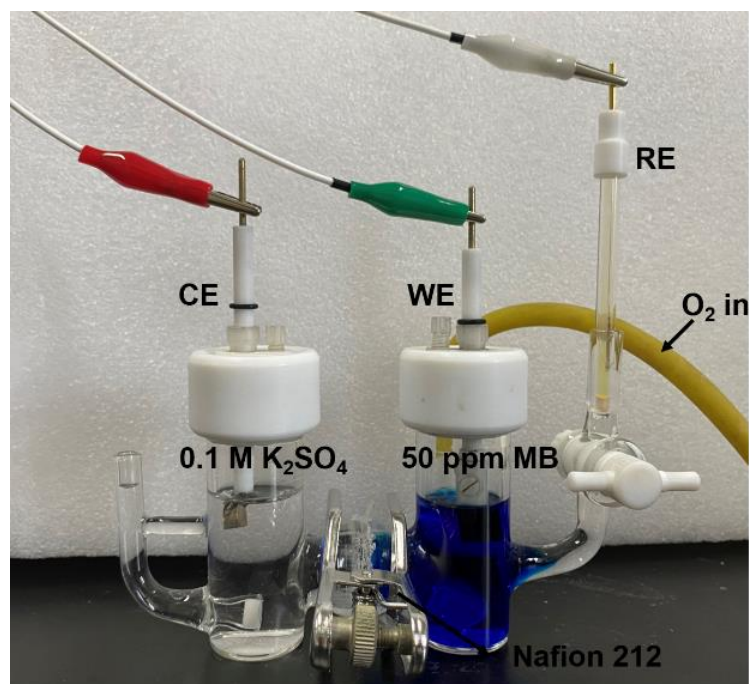

**Fig. S18.** The photograph of the Electro-Fenton device used in this study.

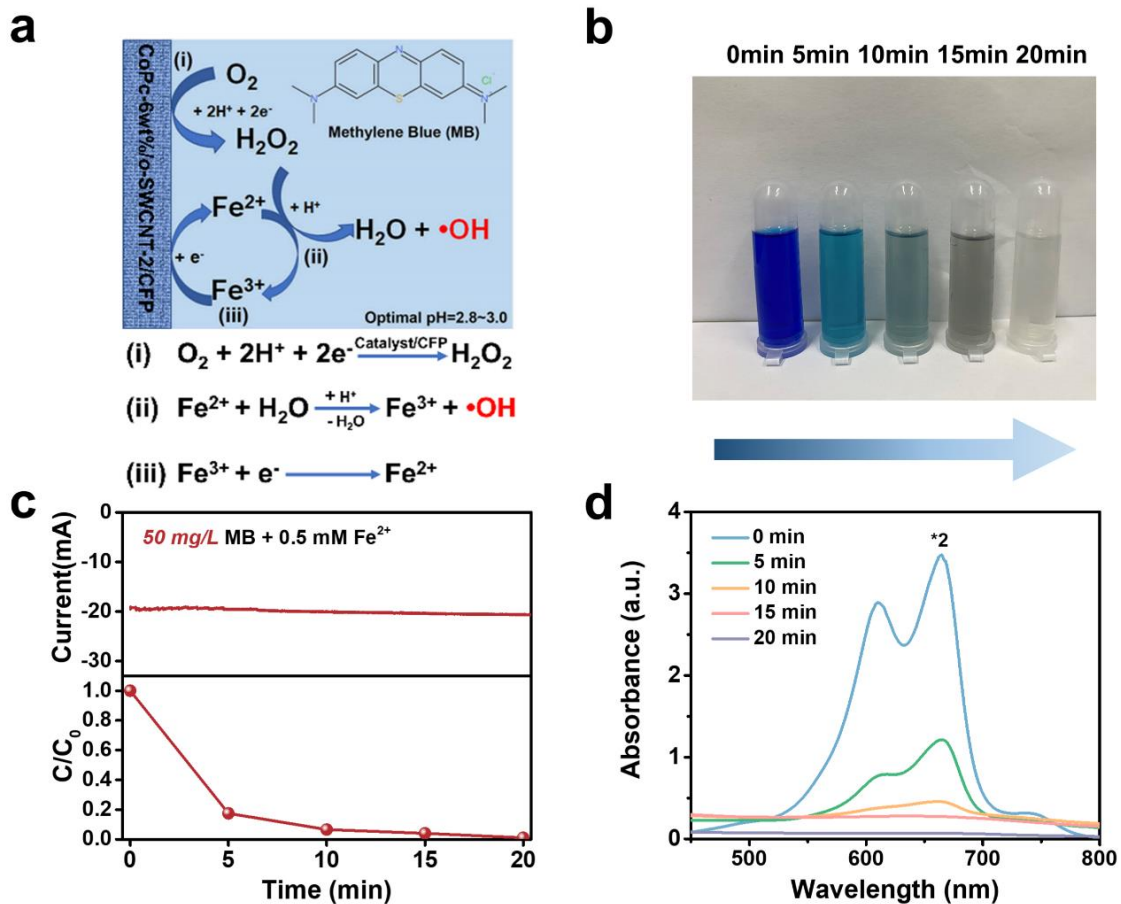

**Fig. S19.** (a) Schematic illustrations of the Electro-Fenton (EF) reaction process using CoPc-6wt%/o-SWCNT-2 as a cathodic catalyst. (b) The photograph of colour fade during the electro-Fenton mineralization. (c) The recorded chronoamperometry curve (Up) and the decay of the MB concentrations over time (Down). (d) The UV-vis absorption spectra of the MB solution.

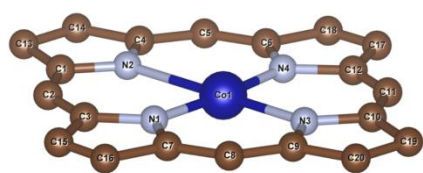

**Co-N<sub>4</sub>**

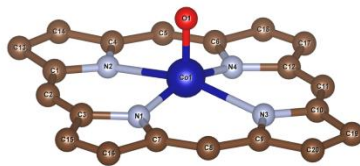

**Co-N<sub>4</sub>O**

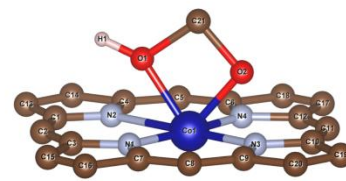

**Co-N<sub>4</sub>O<sub>2</sub>**

**Fig. S20.** Bader charge atom serial number of Co-N<sub>4</sub>, Co-N<sub>4</sub>O and Co-N<sub>4</sub>O<sub>2</sub> models.

**Table S1.** EXAFS fitting parameters at the Co *K*-edge for the CoPc-6wt%/o-SWCNT-2, CoPc and Co foil samples.

| Catalyst                   | Path              | CN <sup>a</sup> | R (Å) <sup>b</sup> | σ <sup>2</sup> (Å <sup>-2</sup> ) <sup>c</sup> | ΔE <sub>0</sub> (eV) <sup>d</sup> | R factor <sup>e</sup> |
|----------------------------|-------------------|-----------------|--------------------|------------------------------------------------|-----------------------------------|-----------------------|
| <b>CoPc-6wt%/o-SWCNT-2</b> | Co-N <sub>1</sub> | 4.1±0.1         | 1.887±0.005        | 0.0018±0.0008                                  | 3.83±0.28                         | 0.0065                |
|                            | Co-O <sub>1</sub> | 1.9±0.1         | 2.429±0.014        | 0.0027±0.0024                                  |                                   |                       |
|                            | Co-C <sub>2</sub> | 8.4±0.8         | 2.892±0.008        | 0.0016±0.0009                                  |                                   |                       |
|                            | Co-N <sub>2</sub> | 4.5±1.0         | 3.288±0.018        | 0.0041±0.0026                                  |                                   |                       |
| <b>CoPc</b>                | Co-N <sub>1</sub> | 3.4±0.1         | 1.907±0.002        | 0.0013±0.0006                                  | 7.28±0.35                         | 0.0040                |
|                            | Co-C <sub>2</sub> | 8.3±0.3         | 2.943±0.003        | 0.0111±0.0082                                  |                                   |                       |
|                            | Co-N <sub>2</sub> | 4.0±0.3         | 3.258±0.007        | 0.0020±0.0013                                  |                                   |                       |
| <b>Co foil</b>             | Co-Co             | 12 <sup>f</sup> | 2.486±0.003        | 0.0043±0.0002                                  | 5.52±0.12                         | 0.0028                |

<sup>a</sup>CN: coordination numbers; <sup>b</sup>R: bond distance; <sup>c</sup>σ<sup>2</sup>: Debye-Waller factors; <sup>d</sup>ΔE<sub>0</sub>: the inner potential correction. <sup>e</sup>R factor: goodness of the fitting. The obtained XAFS data was processed in Athena (version 0.9.26) for background, pre-edge line and post-edge line calibrations. Then Fourier-transformed fitting was carried out in Artemis (version 0.9.26). S<sub>0</sub><sup>2</sup> was fixed as 0.5 for the fitting processes of CoPc-corresponding samples. The *k*-range of 2-10 Å<sup>-1</sup> and *R* range of 1-3 Å were used for the fitting of CoPc-corresponding samples. The *k*-range of 3 -12 Å<sup>-1</sup> and *R* range of 1-3 Å were used for the fitting of Co foil.

**Table S2.** The content of different elements for the six catalysts obtained from XPS measurements.

| <b>Sample</b>                | <b>C (at%)</b> | <b>O ( at%)</b> | <b>N ( at%)</b> | <b>Co ( at%)</b> |
|------------------------------|----------------|-----------------|-----------------|------------------|
| SWCNT                        | 94.59          | 4.22            | 1.14            | 0.05             |
| <i>o</i> -SWCNT-2            | 70.39          | 19.22           | 1.37            | 0.02             |
| CoPc-6wt%/SWCNT              | 93.86          | 4.44            | 1.55            | 0.15             |
| CoPc-6wt%/ <i>o</i> -SWCNT-1 | 89.02          | 9.29            | 1.57            | 0.12             |
| CoPc-6wt%/ <i>o</i> -SWCNT-2 | 77.29          | 20.29           | 2.20            | 0.22             |
| CoPc-6wt%/ <i>o</i> -SWCNT-3 | 63.58          | 34.26           | 2.79            | 0.39             |

**Table S3.** The proportion of different oxygen species of four catalysts obtained from XPS measurements.

| <b>Sample</b>       | <b>C=O (%)</b> | <b>COOH (%)</b> | <b>C-O ( %)</b> |
|---------------------|----------------|-----------------|-----------------|
| CoPc-6wt%/SWCNT     | 14.97          | 44.07           | 40.96           |
| CoPc-6wt%/o-SWCNT-1 | 9.05           | 42.40           | 48.55           |
| CoPc-6wt%/o-SWCNT-2 | 6.21           | 63.21           | 30.58           |
| CoPc-6wt%/o-SWCNT-3 | 4.44           | 46.28           | 49.28           |

**Table S4.** The Co content of five catalysts obtained from ICP measurements.

| <b>Sample</b>        | <b>Co content (wt%)</b> | <b>CoPc content (wt%)</b> |
|----------------------|-------------------------|---------------------------|
| CoPc-6wt%/SWCNT      | 0.28                    | 2.71                      |
| CoPc-1wt%/o-SWCNT-2  | 0.07                    | 0.67                      |
| CoPc-3wt%/o-SWCNT -2 | 0.11                    | 1.07                      |
| CoPc-6wt%/o-SWCNT -2 | 0.36                    | 3.59                      |
| CoPc-9wt%/o-SWCNT -2 | 0.41                    | 3.97                      |

**Table S5.** The EIS measurements of four catalysts.

| <b>Sample</b>        | <b><math>R_s(\Omega)</math></b> | <b><math>R_{ct}(\Omega)</math></b> | <b><math>R_w(\Omega)</math></b> |
|----------------------|---------------------------------|------------------------------------|---------------------------------|
| CoPc-6wt%/SWCNT      | 13                              | 12.15                              | 11.87                           |
| CoPc-6wt%/o-SWCNT-1  | 13.02                           | 11.62                              | 11.15                           |
| CoPc-6wt%/o-SWCNT -2 | 11.90                           | 5.57                               | 8.84                            |
| CoPc-6wt%/o-SWCNT -3 | 12.5                            | 9.13                               | 8.96                            |



**Table S6.** Comparison of the  $2e^-$  ORR  $H_2O_2$  selectivity and with the recently reported transition-metallic SACs in neutral electrolyte.

| Catalyst                   | Electrolyte                      | $H_2O_2$ selectivity (%) | Potential (V vs. RHE) | Ref.             |
|----------------------------|----------------------------------|--------------------------|-----------------------|------------------|
| <b>CoPc-6wt%/o-SWCNT-2</b> | <b>0.1M <math>K_2SO_4</math></b> | <b>82 ~ 95</b>           | <b>0.1 ~ 0.3</b>      | <b>This work</b> |
| CoPc-CNT(O)                | 0.1M $K_2SO_4$                   | 86 ~ 96                  | 0.25 ~0.6             | 11               |
| Co/NC                      | 0.5 M NaCl                       | 93.7                     | 0.55                  | 12               |
| Fe-CNT                     | 0.1 M PBS                        | 80 ~ 97                  | 0.1 ~ 0.5             | 13               |
| O-C(Al)                    | 0.1 M PBS                        | ~ 90                     | 0.1 ~ 0.45            | 14               |
| $Cu_{0.1}SA/CNNS$          | 0.1 M PBS                        | 90                       | 0.3                   | 15               |
| $Ni_{0.1}SA/CNNS$          | 0.1 M PBS                        | 98                       | 0.3                   |                  |
| Cu/NCNSs                   | 0.1 M PBS                        | ~ 78                     | -0.1 ~ 0.4            | 16               |

**Table S7.** Comparison of the  $2e^-$  ORR  $H_2O_2$  yield rate and stability with the recently reported transition-metallic SACs in neutral electrolyte.

| Catalyst                   | Electrolyte                                            | Applied potential<br>(V vs. RHE) | $H_2O_2$ yield rate<br>( $mol \cdot g^{-1} \cdot h^{-1}$ ) | Stability<br>(h) | Ref.             |
|----------------------------|--------------------------------------------------------|----------------------------------|------------------------------------------------------------|------------------|------------------|
| <b>CoPc-6wt%/o-SWCNT-2</b> | <b>1 M <math>Na_2SO_4</math></b><br><b>(Flow cell)</b> | <b>0.1</b>                       | <b>5.85</b>                                                | <b>20</b>        | <b>This work</b> |
|                            | <b>0.1 M <math>K_2SO_4</math></b><br><b>(H-cell)</b>   | <b>0.1</b>                       | <b>3.12</b>                                                | <b>75</b>        |                  |
| CoPc-CNT(O)                | 1 M $Na_2SO_4$<br>(Flow cell)                          | 3.1                              | 26.1                                                       | 100              | 11               |
| Co/NC                      | 0.5 M NaCl<br>(Flow cell)                              | 0.3                              | 4.5                                                        | 24               | 12               |
| Fe-CNT                     | 0.1 M PBS<br>(H-cell)                                  | 0.36                             | 0.65                                                       | 6.5              | 13               |
| O-C(Al)                    | 0.5 M $Na_2SO_4$<br>(H-cell)                           | 0.45                             | 0.51                                                       | 1                | 14               |
| $Ni_{0.1}SA/CNNS$          | 0.1 M PBS<br>(H-cell)                                  | 0.1                              | 0.503                                                      | 16               | 15               |
| $Cu_{0.1}SA/CNNS$          | 0.1 M PBS<br>(H-cell)                                  | 0.1                              | 0.332                                                      | /                |                  |
| Cu/NCNSs                   | 0.1 M PBS<br>(H-cell)                                  | -0.2                             | 0.204                                                      | 30               | 16               |

**Table S8.** Summary of the TOF values of recently reported transition-metallic SACs for H<sub>2</sub>O<sub>2</sub> electrosynthesis in neutral electrolyte.

| <b>Catalyst</b>                    | <b>Active sites</b> | <b>TOF (s<sup>-1</sup>)</b> | <b>Electrolyte</b>                      | <b>Ref.</b>      |
|------------------------------------|---------------------|-----------------------------|-----------------------------------------|------------------|
| <b>CoPc-6wt%/o-SWCNT-2</b>         | <b>CoPc</b>         | <b>25.2</b>                 | <b>1 M Na<sub>2</sub>SO<sub>4</sub></b> | <b>This work</b> |
| CoPc-CNT(O)-1 wt%                  | CoPc                | 56                          | 1 M Na <sub>2</sub> SO <sub>4</sub>     |                  |
| CoPc-CNT(O)-6 wt%                  | CoPc                | 18.5                        | 1 M Na <sub>2</sub> SO <sub>4</sub>     | 11               |
| CoPc-CNT                           | CoPc                | 7                           | 1 M Na <sub>2</sub> SO <sub>4</sub>     |                  |
| O-Co-N <sub>2</sub> C <sub>2</sub> | Co                  | 11.48                       | 0.1 M PBS                               | 17               |
| Fe-CNT                             | Fe                  | 1.96                        | 0.1 M PBS                               | 13               |
| Co/NCNSs                           | Co                  | 1.1                         | 0.1 M PBS                               | 16               |
| Cu/NCNSs                           | Cu                  | 1                           | 0.1 M PBS                               |                  |
| COF-360-Co                         | TAPP-Co             | 0.95                        | 0.1 M K <sub>2</sub> SO <sub>4</sub>    | 18               |

**Table S9.** Bader charge calculation results.

| Serial number | Atoms | Charge variation of Co-N <sub>4</sub> | Serial number | Atoms | Charge variation of Co-N <sub>4</sub> O | Serial number | Atoms | Charge variation of Co-N <sub>4</sub> O <sub>2</sub> |
|---------------|-------|---------------------------------------|---------------|-------|-----------------------------------------|---------------|-------|------------------------------------------------------|
| 1             | N     | 0.97                                  | 1             | N     | 0.95                                    | 1             | N     | 0.91                                                 |
| 2             | N     | 1.09                                  | 2             | N     | 1.05                                    | 2             | N     | 1.04                                                 |
| 3             | N     | 1.02                                  | 3             | N     | 1.05                                    | 3             | N     | 0.96                                                 |
| 4             | N     | 0.99                                  | 4             | N     | 0.95                                    | 4             | N     | 0.84                                                 |
| 5             | C     | -0.47                                 | 5             | C     | -0.42                                   | 5             | C     | -0.43                                                |
| 6             | C     | 0.07                                  | 6             | C     | -0.10                                   | 6             | C     | 0.04                                                 |
| 7             | C     | -0.51                                 | 7             | C     | -0.35                                   | 7             | C     | -0.44                                                |
| 8             | C     | -0.49                                 | 8             | C     | -0.57                                   | 8             | C     | -0.49                                                |
| 9             | C     | 0.00                                  | 9             | C     | 0.02                                    | 9             | C     | 0.06                                                 |
| 10            | C     | -0.36                                 | 10            | C     | -0.38                                   | 10            | C     | -0.45                                                |
| 11            | C     | -0.36                                 | 11            | C     | -0.42                                   | 11            | C     | -0.35                                                |
| 12            | C     | 0.05                                  | 12            | C     | 0.05                                    | 12            | C     | 0.01                                                 |
| 13            | C     | -0.47                                 | 13            | C     | -0.51                                   | 13            | C     | -0.43                                                |
| 14            | C     | -0.38                                 | 14            | C     | -0.48                                   | 14            | C     | -0.37                                                |
| 15            | C     | 0.21                                  | 15            | C     | 0.11                                    | 15            | C     | -0.05                                                |
| 16            | C     | -0.61                                 | 16            | C     | -0.55                                   | 16            | C     | -0.41                                                |
| 17            | C     | -0.06                                 | 17            | C     | -0.10                                   | 17            | C     | -0.11                                                |
| 18            | C     | 0.04                                  | 18            | C     | 0.11                                    | 18            | C     | 0.07                                                 |
| 19            | C     | 0.16                                  | 19            | C     | 0.13                                    | 19            | C     | 0.04                                                 |
| 20            | C     | -0.03                                 | 20            | C     | 0.04                                    | 20            | C     | 0.14                                                 |
| 21            | C     | 0.11                                  | 21            | C     | 0.22                                    | 21            | C     | 0.13                                                 |
| 22            | C     | 0.05                                  | 22            | C     | -0.07                                   | 22            | C     | 0.03                                                 |
| 23            | C     | -0.10                                 | 23            | C     | 0.08                                    | 23            | C     | -0.06                                                |
| 24            | C     | 0.11                                  | 24            | C     | -0.06                                   | 24            | C     | 0.02                                                 |
| 25            | Co    | -1.03                                 | 25            | Co    | -1.26                                   | 25            | C     | -0.44                                                |
|               |       |                                       | 26            | O     | 0.50                                    | 26            | Co    | -1.31                                                |
|               |       |                                       |               |       |                                         | 27            | O     | 0.93                                                 |
|               |       |                                       |               |       |                                         | 28            | O     | 0.63                                                 |
|               |       |                                       |               |       |                                         | 29            | H     | -0.55                                                |

## References

1. W. S. Hummers and R. E. Offeman, *Journal of the American Chemical Society*, 1958, **80**, 1339-1339.
2. Y. Liu, X. Quan, X. Fan, H. Wang and S. Chen, *Angewandte Chemie International Edition*, 2015, **54**, 6837-6841.
3. W. Kohn and L. J. Sham, *Physical Review*, 1965, **140**, 1133-1138.
4. J. Hafner, *Journal of Computational Chemistry*, 2008, **29**, 2044-2078.
5. G. Kresse and J. Furthmuller, *Physical Review B*, 1996, **54**, 11169-11186.
6. P. E. Blochl, *Physical Review B*, 1994, **50**, 17953-17979.
7. J. P. Perdew, K. Burke and M. Ernzerhof, *Physical Review Letters*, 1997, **78**, 1396-1396.
8. S. Grimme, J. Antony, S. Ehrlich and H. Krieg, *Journal of Chemical Physics*, 2010, **132**, 154104.
9. I. C. Man, H.-Y. Su, F. Calle-Vallejo, H. A. Hansen, J. I. Martinez, N. G. Inoglu, J. Kitchin, T. F. Jaramillo, J. K. Norskov and J. Rossmeisl, *Chemcatchem*, 2011, **3**, 1159-1165.
10. J. K. Norskov, J. Rossmeisl, A. Logadottir, L. Lindqvist, J. R. Kitchin, T. Bligaard and H. Jónsson, *Journal of Physical Chemistry B*, 2004, **108**, 17886-17892.
11. B.-H. Lee, H. Shin, A. S. Rasouli, H. Choubisa, P. Ou, R. Dorakhan, I. Grigioni, G. Lee, E. Shirzadi, R. K. Miao, J. Wicks, S. Park, H. S. Lee, J. Zhang, Y. Chen, Z. Chen, D. Sinton, T. Hyeon, Y.-E. Sung and E. H. Sargent, *Nature Catalysis*, 2023, **6**, 234-243.
12. Q. Zhao, Y. Wang, W.-H. Lai, F. Xiao, Y. Lyu, C. Liao and M. Shao, *Energy & Environmental Science*, 2021, **14**, 5444-5456.
13. K. Jiang, S. Back, A. J. Akey, C. Xia, Y. Hu, W. Liang, D. Schaak, E. Stavitski, J. K. Nørskov, S. Siahrostami and H. Wang, *Nature Communications*, 2019, **10**, 3997.
14. Q. Yang, W. Xu, S. Gong, G. Zheng, Z. Tian, Y. Wen, L. Peng, L. Zhang, Z. Lu and L. Chen, *Nature Communications*, 2020, **11**, 5478.
15. H. Yang, F. Ma, N. Lu, S. Tian, G. Liu, Y. Wang, Z. Wang, D. Wang, K. Tao, H. Zhang and S. Peng, *Nanoscale Horizons*, 2023, **8**, 695-704.
16. C. Ye, Y. Zhou, H. Li and Y. Shen, *Green Chemistry*, 2023, **25**, 3931-3939.
17. H. Shen, N. Qiu, L. Yang, X. Guo, K. Zhang, T. Thomas, S. Du, Q. Zheng, J. P. Attfield, Y. Zhu and M. Yang, *Small*, 2022, **18**, 2200730.
18. C. Liu, H. Li, F. Liu, J. Chen, Z. Yu, Z. Yuan, C. Wang, H. Zheng, G. Henkelman, L. Wei and Y. Chen, *Journal of the American Chemical Society*, 2020, **142**, 21861-21871.
